# Supplementary material for: Effect of elevated p CO 2 on trace gas production during an ocean acidification mesocosm experiment
Source: Copernicus journal article supplement (doi:10.5194/bg-2018-148), 2018-05-16
Supplement: Supplementary file [file bg-2018-148-AC1-supplement.pdf]

1 Interactive comment on “Effect of elevated  $p\text{CO}_2$  on trace gas production during an ocean  
2 acidification mesocosm experiment” by Sheng-Hui Zhang et al.

3 B. Qu (Referee)

4 2467327342@qq.com

5 Received and published: 27 May 2018

6 Increases of anthropogenic emissions of  $\text{CO}_2$  since the Industrial Revolution are known to have  
7 influenced organisms and the delivery of oceanic ecosystem services at a global scale. This is an  
8 interesting piece of work that shows the effect of elevated  $p\text{CO}_2$  on trace gases production  
9 including DMS and four halocarbon compounds through a mesocosm experiment. The study is  
10 based on the development of a bloom created by the addition of three different species of cultured  
11 phytoplankton to nutrient enriched coastal water enclosed in mesocosms. Considering that the  
12 impact of ocean acidification on DMS and halocarbons remains controversial, it is necessary to  
13 conduct further study about this aspect. Overall, this paper is well written and the major points are  
14 discussed with clarity. I recommend this article to be published in Biogeosciences after  
15 modification. My major criticism to the manuscript is that the authors point the algae and their  
16 attached bacteria in the coastal environment were removed through filtration process, have you  
17 measured the bacterial abundance in the mesocosm before the three different species of algae  
18 inoculated? In addition, this manuscript lacks the initial concentrations of *Phaeodactylum*  
19 *tricornutum*, *Thalassiosira weissflogii*, and *Emiliana huxleyi* inoculated into the mesocosm.

20 There are also some minor things that I list below:

21 P3, L54 “Further decreases of 0.3–0.4 pH units are predicted by the end of this century (Doney et  
22 al., 2009; Orr et al., 2005), which is commonly referred to as ocean acidification (OA).” Please  
23 update the latest references in this section.

24 P3, L61 “DMS is the most important volatile sulfur compound produced from the algal secondary  
25 metabolite dimethylsulfoniopropionate (DMSP) through complex biological interactions in  
26 marine ecosystems (Stefels et al., 2007).” DMSP is not only produced by algae, but also by  
27 terrestrial plants and marine bacteria. Please re-word this section.

28 P4, L75 Replace “attribute” by “attributed”.

29 P8, L167-L168 What is “LC” and “HC”, low  $\text{CO}_2$  and high  $\text{CO}_2$ ? Please use the full name for the  
30 first time in the manuscript.

31 P8, L172 The unit of chl *a* is not unified with Fig. 1, please check.

32 P9, L192 Replace “for” by “of”

33 P9, L196 delete “growth in”

34 P9, L197-198 Replace “increase in Chl *a* and cell concentrations” by “increase in Chl *a*  
35 concentrations and algal cells”

36 [Response to Reviewer #1:](#)

37 [Dear Reviewer #1:](#)

38 We are grateful to your review of this paper and would like to express our thanks for your helpful  
39 and constructive comments. We have revised the manuscript and addressed all the comments point  
40 by point. The main changes we made are as follows:

41 Increases of anthropogenic emissions of CO<sub>2</sub> since the Industrial Revolution are known to have  
42 influenced organisms and the delivery of oceanic ecosystem services at a global scale. This is an  
43 interesting piece of work that shows the effect of elevated pCO<sub>2</sub> on trace gases production  
44 including DMS and four halocarbon compounds through a mesocosm experiment. The study is  
45 based on the development of a bloom created by the addition of three different species of cultured  
46 phytoplankton to nutrient enriched coastal water enclosed in mesocosms. Considering that the  
47 impact of ocean acidification on DMS and halocarbons remains controversial, it is necessary to  
48 conduct further study about this aspect. Overall, this paper is well written and the major points are  
49 discussed with clarity. I recommend this article to be published in Biogeosciences after  
50 modification. My major criticism to the manuscript is that the authors point the algae and their  
51 attached bacteria in the coastal environment were removed through filtration process, have you  
52 measured the bacterial abundance in the mesocosm before the three different species of algae  
53 inoculated? In addition, this manuscript lacks the initial concentrations of *Phaeodactylum*  
54 *tricornutum*, *Thalassiosira weissflogii*, and *Emiliana huxleyi* inoculated into the mesocosm.

55 Thanks for the reviewer's suggestion and we have added some details about this mesocosm  
56 experiment in the revised manuscript.

57 P6, L125-129 "*Emiliana huxleyi* (CS-369), *Phaeodactylum tricornutum* (CCMA 106), and  
58 *Thalassiosira weissflogii* (CCMA 102) were inoculated into the mesocosm bags, with initial  
59 diatom/coccolithophorid cell ratio was 1:1. The initial concentrations of *Phaeodactylum*  
60 *tricornutum*, *Thalassiosira weissflogii*, and *Emiliana huxleyi* inoculated into the mesocosm were  
61 10, 10, and 20 cells mL<sup>-1</sup>, respectively."

62 P7, L141-142 "Meanwhile, no meaningful numbers of bacteria were counted by flow cytometer in  
63 the pre-filtered seawater before the inoculations."

64 There are also some minor things that I list below:

65 P3, L54 "Further decreases of 0.3–0.4 pH units are predicted by the end of this century (Doney et  
66 al., 2009; Orr et al., 2005), which is commonly referred to as ocean acidification (OA)." Please  
67 update the latest references in this section.

68 Thanks for the reviewer's suggestion and we have updated the latest references in the revised  
69 manuscript.

70 P3, L58-60 "Further decreases of 0.3–0.4 pH units are predicted by the end of this century (Doney  
71 et al., 2009; Orr et al., 2005; Gattuso et al., 2015), which is commonly referred to as ocean  
72 acidification (OA)"

73 "Gattuso, J. P., Magnan, A., Bille, R., Cheung, W. W. L., Howes, E. L., Joos, F., Allemand, D.,  
74 Bopp, L., Cooley, S. R., Eakin, C. M., Hoegh-Guldberg, O., Kelly, R. P., Portner, H. O.,

75 Rogers, A. D., Baxter, J. M., Laffoley, D., Osborn, D., Rankovic, A., Rochette, J., Sumaila,  
76 U.R., Treyer, S., Turley, C.: Contrasting futures for ocean and society from different  
77 anthropogenic CO<sub>2</sub> emissions scenarios. *Science*, 349 (6243), aac4722, 2015.”

78 P3, L61 “DMS is the most important volatile sulfur compound produced from the algal secondary  
79 metabolite dimethylsulfoniopropionate (DMSP) through complex biological interactions in  
80 marine ecosystems (Stefels et al., 2007).” DMSP is not only produced by algae, but also by  
81 terrestrial plants and marine bacteria. Please re-word this section.  
82 Thanks for the reviewer’s suggestion and we have reworded this section in the revised manuscript.

83 P3, L67-71 “DMS is the most important volatile sulfur compound produced from  
84 dimethylsulfoniopropionate (DMSP), which is ubiquitous in marine environments, mainly  
85 synthesized by marine microalgae (Stefels et al., 2007), a few angiosperms, some corals (Raina et  
86 al., 2016), and several heterotrophic bacteria (Curson et al., 2017) through complex biological  
87 interactions in marine ecosystems.”

88 “Raina, J. B., Tapiolas, D., Motti, C. A., Foret, S., Seemann, T., Tebben, J.: Isolation of an  
89 antimicrobial compound produced by bacteria associated with reef-building corals. *PeerJ*, 4,  
90 e2275, 2016”

91 “Curson, A. R., Liu, J., Bermejo Martinez, A., Green, R., Chan, Y., Carrion, O.:  
92 Dimethylsulfoniopropionate biosynthesis in marine bacteria and identification of the key  
93 gene in this process. *Nat. Microbiol.*, 2, 17009, 2017.”

94 P4, L75 Replace “attribute” by “attributed”.

95 Thanks for the reviewer’s suggestion and we have reworded this section in the revised manuscript.

96 P4, L80-84 “Several assumptions have been presented to explain these contrasting results and  
97 attributed the pH-induced variation in DMS-production capability to altered physiology of the  
98 algae cells or of bacterial DMSP degradation (Vogt et al., 2008; Hopkins et al., 2010, Avgoustidi  
99 et al., 2012; Archer et al., 2013; Hopkins and Archer, 2014; Webb et al., 2015)”

100 P8, L167-L168 What is “LC” and “HC”, low CO<sub>2</sub> and high CO<sub>2</sub>? Please use the full name for the  
101 first time in the manuscript.  
102 Thanks for the reviewer’s suggestion and we have used the full name for the first time in the  
103 revised manuscript.

104 P9, L192-195 “The initial chemical parameters of the mesocosm experiment are shown in Table 1.  
105 The initial mean dissolved nitrate (including NO<sub>3</sub><sup>-</sup> and NO<sub>2</sub><sup>-</sup>), NH<sub>4</sub><sup>+</sup>, PO<sub>4</sub><sup>3-</sup> and silicate (SiO<sub>3</sub><sup>2-</sup>)  
106 concentrations were 54, 20, 2.6 and 41 μmol L<sup>-1</sup> for the low pCO<sub>2</sub> (LC) treatment and 52, 21, 2.4  
107 and 38 μmol L<sup>-1</sup> for the high pCO<sub>2</sub> (HC) treatment, respectively.”

108 P8, L172 The unit of chl *a* is not unified with Fig. 1, please check.  
109 According to the opinion of reviewer 2#, Fig. 1 was replaced.

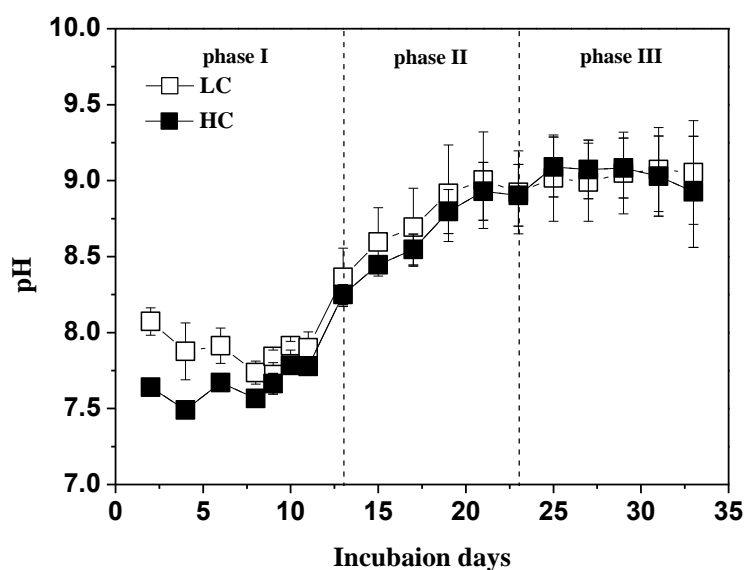

110

111 **Fig. 1.** Temporal changes of pH in the HC (1,000  $\mu\text{atm}$ , solid squares) and LC (400  $\mu\text{atm}$ , white squares)  
 112 mesocosms (3,000 L). Data are mean  $\pm$  standard deviation, n = 3 (triplicate independent mesocosm bags) (Origin  
 113 8.0).

114 P9, L192 Replace “for” by “of”

115 Thanks for the reviewer’s suggestion and we have reworded in the revised manuscript according  
 116 all reviewers’ suggestion.

117 P10, L207-L209 “At the beginning of the experiment, the mean DMS, DMSP and DCB  
 118 concentrations were all low in both treatments due to the low concentrations of DMS, DMSP and  
 119 DCB in the original fjord water and possible loss during the filtration procedure (Fig. 2).”

120 P9, L196 delete “growth in”

121 Thanks for the reviewer’s suggestion and we have modified in the revised manuscript.

122 P10, L217-218 “Compared with DMSP, DMS and DCB concentrations showed similar trends  
 123 during the mesocosm experiment.”

124 P9, L197-198 Replace “increase in Chl *a* and cell concentrations” by “increase in Chl *a*  
 125 concentrations and algal cells”

126 Thanks for the reviewer’s suggestion and we have modified in the revised manuscript.

127 P10, L210-212 “The DMSP concentrations in the HC and LC treatments increased significantly  
 128 along with the increase of Chl *a* concentrations and algal cells, and stayed relatively constant over  
 129 the following days.”

130

131

132 **Effect of elevated  $p\text{CO}_2$  on trace gas production during an**  
133 **ocean acidification mesocosm experiment**

134 Sheng-Hui Zhang<sup>1,3§</sup>, JuanYu<sup>1§</sup>, Qiong-Yao Ding<sup>1</sup>, Hong-Hai Zhang<sup>1</sup>, Gui-Peng Yang<sup>1,2\*</sup>, Kun-  
135 Shan Gao<sup>4</sup>, Da-Wei Pan<sup>3</sup>

136 <sup>1</sup> Key Laboratory of Marine Chemistry Theory and Technology, Ministry of Education, Ocean  
137 University of China, Qingdao 266100, China

138 <sup>2</sup> Laboratory for Marine Ecology and Environmental Science, Qingdao National Laboratory for  
139 Marine Science and Technology, Qingdao 266237, China

140 <sup>3</sup> Key Laboratory of Coastal Environmental Processes and Ecological Remediation, Yantai  
141 Institute of Coastal Zone Research (YIC), Chinese Academy of Sciences(CAS); Shandong  
142 Provincial Key Laboratory of Coastal Environmental Processes, YICCAS, Yantai Shandong  
143 264003, P. R. China

144 <sup>4</sup> State Key Laboratory of Marine Environmental Science, Xiamen University, Xiamen, 361102,  
145 China

146 \* Corresponding author:

147 Prof. Gui-Peng Yang

148 Key Laboratory of Marine Chemistry Theory and Technology

149 Ocean University of China

150 Qingdao 266100

151 China

152 E-mail: gpyang@mail.ouc.edu.cn

153 Tel: +86-532-66782657

154 Fax: +86-532-66782657

155 Author contributions

156 §Sheng-Hui Zhang and JuanYu contributed equally

157

158

159

160

161

162 **Abstract**

163 A mesocosm experiment was conducted in Wuyuan Bay (Xiamen), China to investigate the effects of elevated  
164  $p\text{CO}_2$  on phytoplankton species and production of dimethylsulfide (DMS), dimethylsulfoniopropionate (DMSP)  
165 and DMSP-consuming bacteria (DCB) as well as four halocarbon compounds ( $\text{CHBrCl}_2$ ,  $\text{CH}_3\text{Br}$ ,  $\text{CH}_2\text{Br}_2$ , and  
166  $\text{CH}_3\text{I}$ ). Over a period of 5 weeks, *Phaeodactylum tricornutum* outcompeted *Thalassiosira weissflogii* and  
167 *Emiliana huxleyi*, comprising more than 99% of the final biomass. During the logarithmic growth phase (phase I),  
168 DMS concentrations in high  $p\text{CO}_2$  mesocosms (HC, 1000  $\mu\text{atm}$ ) were 28% lower than those in low  $p\text{CO}_2$   
169 mesocosms (LC, 400  $\mu\text{atm}$ ). Elevated  $p\text{CO}_2$  led to a delay in DCB concentrations attached to *Thalassiosira*  
170 *weissflogii* and *Phaeodactylum tricornutum* and finally resulted in the delay of DMS concentration in the HC  
171 treatment. Unlike DMS, the elevated  $p\text{CO}_2$  did not affect DMSP production ability of *Thalassiosira weissflogii* or  
172 *Phaeodactylum tricornutum* throughout the 5 weeks culture. A positive relationship was detected between  $\text{CH}_3\text{I}$   
173 and *Thalassiosira weissflogii* and *Phaeodactylum tricornutum* during the experiment, and there was a 40%  
174 reduction in mean  $\text{CH}_3\text{I}$  concentrations in the HC mesocosms.  $\text{CHBrCl}_2$ ,  $\text{CH}_3\text{Br}$ , and  $\text{CH}_2\text{Br}_2$  concentrations did  
175 not increase with elevated chlorophyll *a* (Chl *a*) concentrations compared with DMS(P) and  $\text{CH}_3\text{I}$ , and there were  
176 no major peaks both in the HC or LC mesocosms. In addition, no effect of elevated  $p\text{CO}_2$  was identified for any of  
177 the three bromocarbons.

178 **Keywords:** ocean acidification, dimethylsulfide (DMS), dimethylsulfoniopropionate (DMSP), halocarbons,  
179 phytoplankton, bacteria

180

181

182

183 **1. Introduction**

184 Anthropogenic emissions have increased the fugacity of atmospheric carbon dioxide ( $p\text{CO}_2$ ) from  
185 the pre-industrial value of 280  $\mu\text{atm}$  to the present-day value of over 400  $\mu\text{atm}$ , and these values  
186 will further increase to 800–1000  $\mu\text{atm}$  by the end of this century according to the  
187 Intergovernmental Panel on Climate Change (Gattuso et al., 2015). The dissolution of this excess  
188  $\text{CO}_2$  into the surface of the ocean directly affects the carbonate system and has lowered the pH by  
189 0.1 units, from 8.21 to 8.10 over the last 250 years. Further decreases of 0.3–0.4 pH units are  
190 predicted by the end of this century (Doney et al., 2009; Orr et al., 2005; Gattuso et al., 2015),  
191 which is commonly referred to as ocean acidification (OA). The physiological and ecological  
192 aspects of the phytoplankton response to this changing environment can potentially alter marine  
193 phytoplankton community composition, community biomass, and feedback to biogeochemical  
194 cycles (Boyd and Doney, 2002). These changes simultaneously have an impact on some volatile  
195 organic compounds produced by marine phytoplankton (Liss et al., 2014; Liu et al., 2017),  
196 including the climatically important trace gas dimethylsulfide (DMS) and a number of volatile  
197 halocarbon compounds.

198 DMS is the most important volatile sulfur compound produced from  
199 dimethylsulfoniopropionate (DMSP), which is ubiquitous in marine environments, mainly  
200 synthesized by marine microalgae (Stefels et al., 2007), a few angiosperms, some corals (Raina et  
201 al., 2016), and several heterotrophic bacteria (Curson et al., 2017) through complex biological  
202 interactions in marine ecosystems. Although it remains controversial, DMS and its by-products,  
203 such as methanesulfonic acid and non-sea-salt sulfate, are suspected to have a prominent part in  
204 climate feedback (Charlson et al., 1987; Quinn and Bates, 2011). The conversion of DMSP to

205 DMS is facilitated by several enzymes, including DMSP-lyase and acyl CoA transferase  
206 (Kirkwood et al., 2010; Todd et al., 2007); these enzymes are mainly found in phytoplankton,  
207 macroalgae, *Symbiodinium*, bacteria and fungi (de Souza and Yoch, 1995; Stefels and Dijkhuizen,  
208 1996; Steinke and Kirst, 1996; Bacic and Yoch, 1998; Yost and Mitchelmore, 2009). Several  
209 studies have shown a negative impact of decreasing pH on DMS-production capability (Hopkins  
210 et al., 2010; Avgoustidi et al., 2012; Archer et al., 2013; Webb et al., 2016), while others have  
211 found either no effect or a positive effect (Vogt et al., 2008; Hopkins and Archer, 2014). Several  
212 assumptions have been presented to explain these contrasting results and attributed the pH-  
213 induced variation in DMS-production capability to altered physiology of the algae cells or of  
214 bacterial DMSP degradation (Vogt et al., 2008; Hopkins et al., 2010, Avgoustidi et al., 2012;  
215 Archer et al., 2013; Hopkins and Archer, 2014; Webb et al., 2015).

216 Halocarbons also play a significant role in the global climate because they are linked to  
217 tropospheric and stratospheric ozone depletion and a synergistic effect of chlorine and bromine  
218 species has been reported that they may account for approximately 20% of the polar stratospheric  
219 ozone depletion (Roy et al., 2011). In addition, iodocarbons can release atomic iodine (I) quickly  
220 through photolysis in the atmospheric boundary layer and I atoms are very efficient in the catalytic  
221 removal of O<sub>3</sub>, which governs the lifetime of many climate relevant gases including methane and  
222 DMS (Jenkins et al., 1991). Compared with DMS, limited attention was received about the effect  
223 of OA on halocarbon concentrations. Hopkins et al. (2010) and Webb et al. (2015) measured lower  
224 concentrations of several iodocarbons, while bromocarbons were unaffected by elevated *p*CO<sub>2</sub>  
225 through two acidification experiments. In addition, an additional mesocosm study did not elicit  
226 significant differences from any halocarbon compounds at up to 1,400  $\mu$ atm *p*CO<sub>2</sub> (Hopkins et al.,



227 2013).

228 DMS and halocarbons play a significant role in the global climate and perhaps act a greater  
229 extent in the future. Meanwhile, the combined picture arising from existing studies is that the  
230 response of communities to OA is not predictable and further studies were required. Based on the  
231 controversial results about OA on DMS and halocarbons production, a mesocosm experiment was  
232 conducted in Wu Yuan Bay, Xiamen. The aim of this study was to investigate the influence of  
233 elevated  $p\text{CO}_2$  on diatoms and coccolithophores and to further understand how the productions of  
234 DMS and halocarbons respond to OA.

## 235 2. Experimental method

### 236 2.1 General experimental device

237 The mesocosm experiments were carried out on a floating platform at the Facility for Ocean  
238 Acidification Impacts Study of Xiamen University (FOANIC-XMU, 24.52 N, 117.18 E) (for full  
239 technical details of the mesocosms, see Liu et al. 2017). Six cylindrical transparent thermoplastic  
240 polyurethane bags with domes were deployed along the south side of the platform. The width and  
241 depth of each mesocosm bag was 1.5 m and 3 m, respectively. Filtered (0.01  $\mu\text{m}$ , achieved using  
242 an ultrafiltration water purifier, MU801-4T, Midea, Guangdong, China) *in situ* seawater was  
243 pumped into the six bags simultaneously within 24 h. A known amount of NaCl solution was  
244 added to each bag to calculate the exact volume of seawater in the bags, according to a  
245 comparison of the salinity before and after adding salt (Czerny et al., 2013). The initial *in situ*  
246  $p\text{CO}_2$  was about 650  $\mu\text{atm}$ . To set the low and high  $p\text{CO}_2$  levels, we added  $\text{Na}_2\text{CO}_3$  solution and  
247  $\text{CO}_2$  saturated seawater to the mesocosm bags to alter total alkalinity and dissolved inorganic  
248 carbon (Gattuso et al., 2010; Riebesell et al., 2013). Subsequently, during the whole experimental

249 process, air at the ambient (400  $\mu\text{atm}$ ) and elevated  $p\text{CO}_2$  (1000  $\mu\text{atm}$ ) concentrations was  
250 continuously bubbled into the mesocosm bags using a  $\text{CO}_2$  Enricher (CE-100B, Wuhan Ruihua  
251 Instrument & Equipment Ltd., Wuhan, China). Because the seawater in the mesocosm was filtered,  
252 the algae in the coastal environment and their attached bacteria were removed and the trace gases  
253 produced in the environment did not influence the mesocosm trace gas concentrations after the  
254 bags were sealed.

## 255 2.2 Algal strains

256 *Emiliania huxleyi* (CS-369), *Phaeodactylum tricornutum* (CCMA 106), and *Thalassiosira*  
257 *weissflogii* (CCMA 102) were inoculated into the mesocosm bags, with an initial  
258 diatom/coccolithophorid cell ratio of 1:1. The initial concentrations of *Phaeodactylum*  
259 *tricornutum*, *Thalassiosira weissflogii*, and *Emiliania huxleyi* inoculated into the mesocosm were  
260 10, 10, and 20 cells  $\text{mL}^{-1}$ , respectively. *Phaeodactylum tricornutum* and *Thalassiosira*  
261 *weissflogii* were obtained from the Center for Collections of Marine Bacteria and Phytoplankton  
262 of the State Key Laboratory of Marine Environmental Science (Xiamen University).  
263 *Phaeodactylum tricornutum* was originally isolated from the South China Sea in 2004 and  
264 *Thalassiosira weissflogii* was isolated from Daya Bay in the coastal South China Sea. *Emiliania*  
265 *huxleyi* was originally isolated in 1992 from the field station of the University of Bergen  
266 (Raunefjorden; 60°18'N, 05°15'E). Before being introduced into the mesocosms, the three  
267 phytoplankton species were cultured in autoclaved, pre-filtered seawater from Wuyuan Bay at  
268 16 °C (similar to the in situ temperature of Wuyuan Bay) without any addition of nutrients.  
269 Cultures were continuously aerated with filtered ambient air containing 400  $\mu\text{atm}$  of  $\text{CO}_2$  within  
270 plant chambers (HP1000G-D, Wuhan Ruihua Instrument & Equipment, China) at a constant

271 bubbling rate of 300 mL min<sup>-1</sup>. The culture medium was renewed every 24 h to maintain the cells  
272 of each phytoplankton species in exponential growth. Meanwhile, no meaningful numbers of  
273 bacteria were counted by flow cytometer in the pre-filtered seawater before the inoculations.

#### 274 *2.3 Sampling for DMS(P) and halocarbons*

275 DMS(P) and halocarbons samples were generally obtained from six mesocosms at 9 a.m., then all  
276 collected samples were transported into a dark cool box back to the laboratory onshore for  
277 analysis within 1 h. For DMS analysis, 2 mL sample was gently filtered through a 25 mm GF/F  
278 (glass fiber) filter and transferred to a purge and trap system linked to a Shimadzu GC-2014 gas  
279 chromatograph (Tokyo, Japan) equipped with a glass column packed with 10% DEGS on  
280 Chromosorb W-AW-DMCS (3 m × 3 mm) and a flame photometric detector (FPD) (Zhang et al.,  
281 2014). For total DMSP analysis, 10 mL water sample was fixed using 50 µL of 50 % H<sub>2</sub>SO<sub>4</sub> and  
282 sealed (Kiene and Slezak, 2006). After > 1 d preservation, DMSP samples were hydrolysed for 24  
283 h with a pellet of KOH (final pH > 13) to fully convert DMSP to DMS. Then, 2 mL hydrolysed  
284 sample was carefully transferred to the purge and trap system mentioned above for extraction of  
285 DMS. For halocarbons, 100 mL sample was purged at 40 °C with pure nitrogen at a flow rate of  
286 100 mL min<sup>-1</sup> for 12 min using another purge and trap system coupled to an Agilent 6890 gas  
287 chromatograph (Agilent Technologies, Palo Alto, CA, USA) equipped with an electron capture  
288 detector (ECD) as well as a 60 m DB-624 capillary column (0.53 mm ID; film thickness, 3 µm)  
289 (Yang et al., 2010). The analytical precision for duplicate measurements of DMS(P) and  
290 halocarbons was > 10%.

#### 291 *2.4 Measurements of chlorophyll a*

292 Chlorophyll *a* (Chl *a*) was measured in water samples (200–1,000 mL) collected every 2 d at 9

293 a.m. by filtering onto Whatman GF/F filters (25 mm). The filters were placed in 5 mL 100%  
294 methanol overnight at 4 °C and centrifuged at 5000 r min<sup>-1</sup> for 10 min. The absorbance of the  
295 supernatant (2.5 mL) was measured from 250 to 800 nm using a scanning spectrophotometer (DU  
296 800, Beckman Coulter Inc., Brea, CA, USA). Chl *a* concentration was calculated according to the  
297 equation reported by Porra (2002).

### 298 *2.5 Enumeration of DMSP-consuming bacteria (DCB)*

299 The number of DMSP-consuming bacteria (DCB) was estimated using the most probable number  
300 (MPN) methodology. The MPN medium consisted of a mixture (1:1 v/v) of sterile artificial sea  
301 water (ASW) and mineral medium (Visscher et al., 1991), 3 mL of which was dispensed in 6 mL  
302 test tubes, which were closed off by an over-sized cap, allowing gas exchange. Triplicate dilution  
303 series were set up. All test tubes contained 1 mmol L<sup>-1</sup> DMSP as the sole organic carbon source  
304 and were kept at 30 °C in the dark. After 2 weeks, the presence/absence of bacteria in the tubes  
305 was verified by DAPI staining (Porter and Feig, 1980). Three tubes containing 3 mL ASW  
306 without substrate were used as controls.

### 307 *2.6 Statistical analysis*

308 One-way analysis of variance (ANOVA), Tukey's test, and the two-sample *t*-test were carried out  
309 to demonstrate the differences between treatments. A *p*-value < 0.05 was considered significant.  
310 Relationships between DMS(P), halocarbons and a range of other parameters were detected using  
311 Pearson's correlation analysis via SPSS 22.0 for Windows (SPSS Inc., Chicago, IL, USA).

## 312 **3. Results and Discussion**

313 *3.1 Temporal changes in pH, Chl a, Phaeodactylum tricornutum, Thalassiosira weissflogii, and*  
314 *Emiliana huxleyi during the experiment*

315 During the experiment, the seawater in each mesocosm was well combined, and the temperature  
316 and salinity were well controlled, with a mean of 16 °C and 29 in all mesocosms, respectively.  
317 Meanwhile, we observed significant differences in pH levels between the two CO<sub>2</sub> treatments on  
318 days 0–11, but the differences disappeared with subsequent phytoplankton growth (Fig. 1). The  
319 phytoplankton growth process was divided into three phases in terms of variations in Chl *a*  
320 concentrations in the mesocosm experiments as described in Liu et al. (2017): i) the logarithmic  
321 growth phase (phase I, days 0–13), ii) a plateau phase (phase II, days 13–23, bloom period), and iii)  
322 a secondary plateau phase (phase III, days 23–33) attained after a decline in biomass from a  
323 maximum in phase II. The initial chemical parameters of the mesocosm experiment are shown in  
324 Table 1. The initial mean dissolved nitrate (including NO<sub>3</sub><sup>-</sup> and NO<sub>2</sub><sup>-</sup>), NH<sub>4</sub><sup>+</sup>, PO<sub>4</sub><sup>3-</sup> and silicate  
325 (SiO<sub>3</sub><sup>2-</sup>) concentrations were 54, 20, 2.6 and 41 μmol L<sup>-1</sup> for the low pCO<sub>2</sub> (LC) treatment and 52,  
326 21, 2.4 and 38 μmol L<sup>-1</sup> for the high pCO<sub>2</sub> (HC) treatment, respectively. The nutrient  
327 concentrations (NO<sub>3</sub><sup>-</sup>, NO<sub>2</sub><sup>-</sup>, NH<sub>4</sub><sup>+</sup> and phosphate) during phase I were consumed rapidly and  
328 their concentrations were below or close to the detection limit during phase II (Table 1). In  
329 addition, although dissolved inorganic nitrogen (NH<sub>4</sub><sup>+</sup>, NO<sub>3</sub><sup>-</sup>, and NO<sub>2</sub><sup>-</sup>) and phosphate were  
330 depleted, Chl *a* concentration in both treatments (biomass dominated by *Phaeodactylum*  
331 *tricornutum*) remained constant over days 12–22, and then declined over subsequent days (Liu et  
332 al., 2017). *Emiliana huxleyi* was only found in phase I and its maximal concentration reached 310  
333 cells mL<sup>-1</sup> according to the results of microscopic inspection. *Thalassiosira weissflogii* was found  
334 throughout the entire period in each bag, but the maximum concentration was 8,120 cells mL<sup>-1</sup>,  
335 which was far less than the concentration of *Phaeodactylum tricornutum* with a maximum density  
336 of about 1.5 million cells mL<sup>-1</sup> (Liu et al., 2017).

337 3.2 Impact of elevated pCO<sub>2</sub> on DMS and DMSP production

338 At the beginning of the experiment, the mean DMS, DMSP and DCB concentrations were all low  
339 in both treatments due to the low concentrations of DMS, DMSP and DCB in the original fjord  
340 water and possible loss during the filtration procedure (Fig. 2). With the growth of phytoplankton,  
341 DMS, DMSP and DCB showed slightly different trends during the mesocosm experiment. The  
342 DMSP concentrations in the HC and LC treatments increased significantly along with the increase  
343 of Chl *a* concentrations and algal cells, and stayed relatively constant over the following days. A  
344 significant positive relationship was observed between DMSP and phytoplankton in the  
345 experiment ( $r = 0.961$ ,  $p < 0.01$  for *Phaeodactylum tricornutum*,  $r = 0.617$ ,  $p < 0.01$  for  
346 *Thalassiosira weissflogii* in the LC treatment, table 2;  $r = 0.954$ ,  $p < 0.01$  for *Phaeodactylum*  
347 *tricornutum*,  $r = 0.743$ ,  $p < 0.01$  for *Thalassiosira weissflogii* in the HC treatment, table 3).  
348 Compared with DMSP, DMS and DCB concentrations showed similar trends during the  
349 mesocosm experiment. DMS concentrations in the LC and HC treatments were 1.03 and 0.74  
350 nmol L<sup>-1</sup>, respectively, while DCB concentrations in the LC and HC treatments were  $0.20 \times 10^6$   
351 and  $0.16 \times 10^6$  cells mL<sup>-1</sup>. DMS and DCB concentrations did not increase significantly during  
352 phase I, but began to increase rapidly on day 15. DCB concentrations in the LC and HC treatments  
353 peaked on days 21 ( $11.65 \times 10^6$  cells mL<sup>-1</sup>) and 23 ( $10.70 \times 10^6$  cells mL<sup>-1</sup>), while DMS  
354 concentrations in the LC and HC treatments peaked on days 25 (112.1 nmol L<sup>-1</sup>) and 30 (101.9  
355 nmol L<sup>-1</sup>). Both DMS and DCB concentrations began to decrease obviously during phase III.  
356 Meanwhile, a significant positive relationship was also observed between DMS and  
357 *Phaeodactylum tricornutum* ( $r = 0.560$ ,  $p < 0.05$  in the LC treatment;  $r = 0.635$ ,  $p < 0.01$  in the  
358 HC treatment), while no relationship was observed between DMS and *Thalassiosira weissflogii*

359 (table 2 and table 3) during the experiment.

360 In this study, no difference in mean DMSP concentrations was observed between the two  
361 treatments, indicating that elevated  $p\text{CO}_2$  had no significant influence on DMSP production in  
362 *Phaeodactylum tricornutum* and *Thalassiosira weissflogii* throughout this study. However, a  
363 significant 29% reduction in DMS concentrations was detected in the HC treatment compared  
364 with the LC treatment ( $p = 0.016$ ), though no statistical difference for DCB concentrations was  
365 found between the LC and HC treatments during phase I. This reduction in DMS concentrations  
366 may be attributed to greater consumption of DMS and conversion to DMSO (Webb et al., 2015).  
367 In addition, the peak DMS concentration in the HC treatment was delayed 5 days relative to that in  
368 the LC treatment during phase II (Fig. 2-A). This result has been observed in previous mesocosm  
369 experiments and it was attributed to small scale shifts in community composition and succession  
370 that could not be identified with only a once-daily measurement regime (Vogt et al., 2008; Webb et  
371 al., 2016). However, this phenomenon can be explained in another straightforward way during this  
372 study. Previous studies have showed that marine bacteria play a key role in DMS production and the  
373 efficiency of bacteria converting DMSP to DMS may vary from 2 to 100% depending on the  
374 nutrient status of the bacteria and the quantity of dissolved organic matter (Simó et al., 2002, 2009;  
375 Kiene et al., 1999, 2000). In addition, a significant positive relationship was also observed  
376 between DMS and DCB ( $r = 0.643$ ,  $p < 0.01$  in the LC treatment;  $r = 0.544$ ,  $p < 0.01$  in the HC  
377 treatment) during this experiment. All of these observations point to the importance of bacteria in  
378 DMS and DMSP dynamics. During the present mesocosm experiment, DMSP concentrations in  
379 the LC treatment decreased slightly on day 23, while the slight decrease appeared on day 29 in the  
380 HC treatment (Fig. 2-B). In addition, the time that the DMSP concentration began to decrease was

381 very close to the time when the highest DMS concentration occurred in both treatments. Moreover,  
382 DCB peaked on days 21 ( $11.65 \times 10^6$  cells  $\text{mL}^{-1}$ ) and 23 ( $10.70 \times 10^6$  cells  $\text{mL}^{-1}$ ) in the LC and  
383 HC treatments, respectively, as shown in Fig. 2-C. Similar to DMS, DCB was also delayed in the  
384 HC mesocosm compared to that in the LC mesocosm. Taken together, we inferred that the  
385 elevated  $p\text{CO}_2$  first delayed growth of DCB in the mesocosm, then the delayed DCB postponed  
386 the DMSP degradation process, and eventually delayed the DMS concentration in the HC  
387 treatment. In addition, considering that the algae and their attached bacteria were removed through  
388 a filtering process before the experiment and the unattached bacteria were maintained in a  
389 relatively constant concentration during this mesocosm experiment (Huang et al., 2018), we  
390 further concluded that the elevated  $p\text{CO}_2$  controlled DMS concentrations mainly by affecting DCB  
391 attached to *Thalassiosira weissflogii* and *Phaeodactylum tricorunatum*.

### 392 3.3 Impact of elevated $p\text{CO}_2$ on halocarbon compounds

393 The temporal development in  $\text{CHBrCl}_2$ ,  $\text{CH}_3\text{Br}$ , and  $\text{CH}_2\text{Br}_2$  concentrations is shown in Fig. 3 (A–  
394 C) and the temporal changes of their concentrations were substantially different from those of  
395 DMS, DMSP, *Phaeodactylum tricorunatum* and *Thalassiosira weissflogii*. The mean  
396 concentrations of  $\text{CHBrCl}_2$ ,  $\text{CH}_3\text{Br}$  and  $\text{CH}_2\text{Br}_2$  for the entire experiment were 8.58, 7.85, and 5.13  
397  $\text{pmol L}^{-1}$  in the LC treatment and 8.81, 9.73, and 6.27  $\text{pmol L}^{-1}$  in the HC treatment. The  
398 concentrations of  $\text{CHBrCl}_2$ ,  $\text{CH}_3\text{Br}$ , and  $\text{CH}_2\text{Br}_2$  did not increase with the Chl *a* concentration  
399 compared with those of DMS and DMSP, and no major peaks were detected in the mesocosms. In  
400 addition, no effect of elevated  $p\text{CO}_2$  was identified for any of the three bromocarbons, which  
401 compared well with previous mesocosm findings (Hopkins et al., 2010, 2013; Webb, et al., 2016).  
402 No clear correlation was observed between the three bromocarbons and any of the measured algal



403 groups (table 2 and table 3), indicating that *Phaeodactylum tricornuntum* and *Thalassiosira*  
404 *weissflogii* did not primarily release these three bromocarbons during the mesocosm experiment.  
405 Previous studies have reported that large-size cyanobacteria, such as *Aphanizomenon flos-aquae*,  
406 produce bromocarbons (Karlsson et al. 2008) and significant correlations between cyanobacterium  
407 abundance and several bromocarbons have been reported in the Arabian Sea (Roy et al., 2011).  
408 However, the filtration procedure led to the loss of cyanobacterium in the mesocosms and finally  
409 resulted in low bromocarbon concentrations during the experiment, although *Phaeodactylum*  
410 *tricornuntum* and *Thalassiosira weissflogii* abundances were high.

411 The temporal dynamics of CH<sub>3</sub>I in the HC and LC treatments are shown in Fig. 3-D. The CH<sub>3</sub>I  
412 concentrations in the LC treatment varied from 0.38 to 12.61 pmol L<sup>-1</sup>, with a mean of 4.76 pmol  
413 L<sup>-1</sup>. The CH<sub>3</sub>I concentrations in the HC treatment ranged between 0.44 and 8.78 pmol L<sup>-1</sup>, with a  
414 mean of 2.88 pmol L<sup>-1</sup>. The maximum CH<sub>3</sub>I concentrations in the HC and LC treatments were  
415 both observed on day 23. The range of CH<sub>3</sub>I concentrations during this experiment was similar to  
416 that measured in the mesocosm experiment (< 1~10 pmol L<sup>-1</sup>) in Kongsfjorden conducted by  
417 Hopkins et al. (2013). In addition, the mean CH<sub>3</sub>I concentration in the LC treatment was similar to  
418 that measured in the East China Sea, with an average of 5.34 pmol L<sup>-1</sup> in winter and 5.74 pmol L<sup>-1</sup>  
419 in summer (Yuan et al., 2015). Meanwhile, a positive relationship was detected between CH<sub>3</sub>I and  
420 Chl *a*, *Phaeodactylum tricornuntum* and *Thalassiosira weissflogii* ( $r = 0.588$ ,  $p < 0.01$  in the LC  
421 treatment;  $r = 0.834$ ,  $p < 0.01$  in the LC treatment for *Phaeodactylum tricornuntum*;  $r = 0.680$   $p <$   
422  $0.01$  in the LC treatment;  $r = 0.690$ ,  $p < 0.01$  in the HC treatment for *Thalassiosira weissflogii*;  $r =$   
423  $0.717$ ,  $p < 0.01$  in the LC treatment;  $r = 0.741$ ,  $p < 0.01$  in the HC treatment for Chl *a*). This result  
424 agrees with previous mesocosm (Hopkins et al., 2013) and laboratory experiments (Hughes et al.,

425 2013; Manley and De La Cuesta, 1997) identifying diatoms as significant producers of CH<sub>3</sub>I.  
426 Moreover, similar to DMS, the maximum CH<sub>3</sub>I concentration also occurred after the maxima of  
427 *Phaeodactylum tricornutum* and *Thalassiosira weissflogii*, at about 4 d (Fig. 3-D). This was  
428 similar to iodocarbon gases measured in a Norway mesocosm conducted by Hopkins et al. (2010)  
429 and chloriodomethane (CH<sub>2</sub>CI) concentrations measured in another Norway mesocosm  
430 conducted by Wingenter et al. (2007). Furthermore, the CH<sub>3</sub>I concentrations measured in the HC  
431 treatment were significantly lower than those measured in the LC treatment during the mesocosm,  
432 which is in accord with the discoveries of Hopkins et al. (2010) and Webb et al. (2015) but in  
433 contrast to the findings of Hopkins et al. (2013) and Webb et al. (2016). Throughout the mesocosm  
434 experiment, there was a 40.2% reduction in the HC mesocosm compared to the LC mesocosm.  
435 Considering that the phytoplankton species did not show significant differences in the HC and LC  
436 treatments during the experiment, this reduction in the HC treatment was likely not caused by  
437 phytoplankton. Apart from direct biological production via methyl transferase enzyme activity by  
438 both phytoplankton and bacteria (Amachi et al., 2001), CH<sub>3</sub>I is produced from the breakdown of  
439 higher molecular weight iodine-containing organic matter (Fenical, 1982) through photochemical  
440 reactions between organic matter and light (Richter and Wallace, 2004). Both bacterial methyl  
441 transferase enzyme activity and a photochemical reaction may have reduced the CH<sub>3</sub>I  
442 concentrations in the HC treatment but further experiments are needed to verify this result.

#### 443 **4. Conclusions**

444 In this study, the effects of increased levels of *p*CO<sub>2</sub> on marine DMS(P) and halocarbons release  
445 were studied in a controlled mesocosm facility. A 28.2% reduction during the logarithmic growth  
446 phase and a 5 d delay in DMS concentration was observed in the HC treatment due to the effect of

447 elevated  $p\text{CO}_2$ . Because the seawater in the mesocosm was filtered, the algae in the coastal  
448 environment and their attached bacteria were removed and the trace gases produced in the  
449 environment did not influence the mesocosm trace gas concentrations after the bags were sealed.  
450 Therefore, we attribute this phenomenon to the DMSP-consuming bacteria attached to  
451 *Phaeodactylum tricornutum* and *Thalassiosira weissflogii*. More attention should be paid to the  
452 DMSP-consuming bacteria attached to algae under different pH values in future studies. Three  
453 bromocarbons compounds were not correlated with a range of biological parameters, as they were  
454 affected by the filtration procedure and elevated  $p\text{CO}_2$  had no effect on any of the three  
455 bromocarbons. The temporal dynamics of  $\text{CH}_3\text{I}$ , combined with strong correlations with biological  
456 parameters, indicated biological control of the concentrations of this gas. In addition, the  
457 production of  $\text{CH}_3\text{I}$  was sensitive to  $p\text{CO}_2$ , with a significant increase in  $\text{CH}_3\text{I}$  concentration at  
458 higher  $p\text{CO}_2$ . However, without additional empirical measurements, it is unclear whether this  
459 decrease was caused by bacterial methyl transferase enzyme activity or by photochemical  
460 degradation at higher  $p\text{CO}_2$ .

461 Author contribution: Gui-Peng Yang and Kun-Shan Gao designed the experiments. Sheng-Hui  
462 Zhang, Juan Yu and Qiong-Yao Ding carried out the experiments and prepared the manuscript.  
463 Hong-Hai Zhang and Da-Wei Pan revised the paper.

#### 464 **Acknowledgements**

465 This study was financially supported by the National Natural Science Foundation of China (Grant  
466 Nos. 41320104008 and 41576073), the National Key Research and Development Program of  
467 China (Grant No. 2016YFA0601300), the National Natural Science Foundation for Creative

468 Research Groups (Grant No. 41521064), and AoShan Talents Program of Qingdao National  
469 Laboratory for Marine Science and Technology (No. 2015 ASTP). We are thankful to Minhan Dai  
470 for the nutrient data and to Bangqin Huang for the bacterial data.

471 Competing interests: The authors declare that they have no conflict of interest.

## 472 **References**

473 Amachi, S., Kamagata, Y., Kanagawa, T., and Muramatsu, Y.: Bacteria mediate methylation of iodine in marine  
474 and terrestrial environments, *Appl. Environ. Microb.*, 67, 2718–2722, 2001.

475 Archer, S. D., Kimmance, S. A., Stephens, J. A., Hopkins, F. E., Bellerby, R. G. J., Schulz, K. G., Piontek, J., and  
476 Engel, A.: Contrasting responses of DMS and DMSP to ocean acidification in Arctic waters, *Biogeosciences*,  
477 10, 1893–1908, 2013.

478 Avgoustidi, V., Nightingale, P. D., Joint, I., Steinke, M., Turner, S. M., Hopkins, F. E., and Liss, P. S.: Decreased  
479 marine dimethyl sulfide production under elevated CO<sub>2</sub> levels in mesocosm and in vitro studies, *Environ.*  
480 *Chem.*, 9, 399–404, 2012.

481 Bacic, M. K., Yoch, D. C.: In vivo characterization of dimethylsulfoniopropionatelyase in the fungus  
482 *Fusariumlateritium*, *Appl. Environ. Microbiol.*, 64, 106–111, 1998.

483 Boyd, P. W., Doney, S. C.: Modelling regional responses by marine pelagic ecosystems to global climate change,  
484 *Geophys. Res. Lett.*, 29, 1–4, 2002.

485 Charlson, R. J., Lovelock, J. E., Andreae, M. O., Wakeham, S. G.: Oceanic phytoplankton, atmospheric sulfur,  
486 cloud albedo and climate, *Nature*, 326, 655–661, 1987.

487 Curson, A. R., Liu, J., Bermejo Martinez, A., Green, R., Chan, Y., Carrion, O.: Dimethylsulfoniopropionate  
488 biosynthesis in marine bacteria and identification of the key gene in this process, *Nat. Microbiol.*, 2, 17009,  
489 2017.

490 Czerny, J., Schulz, K. G., Ludwig, A., and Riebesell, U.: Technical Note: A simple method for air–sea gas  
491 exchange measurements in mesocosms and its application in carbon budgeting, *Biogeosciences*, 10, 1379–  
492 1390, 2013.

493 de Souza, M. P., Yoch, D. C.: Purification and characterization of dimethylsulfoniopropionatelyase from an  
494 *Alcaligenes*-like dimethyl sulfide-producing marine isolate, *Appl. Environ. Microbiol.*, 61, 21–26, 1995.

495 Doney, S. C., Fabry, V. J., Feely, R. A., Kleypas, J. A.: Ocean acidification: the other CO<sub>2</sub> problem, *Annu. Rev. Mar.*  
496 *Sci.*, 1, 169–192, 2009.

497 Fenical, W.: Natural products chemistry in the marine environment, *Science*, 215, 923–928, 1982.

498 Gattuso, J. P., Gao, K., Lee, K., Rost, B., Schulz, K. G.: Approaches and tools to manipulate the carbonate  
499 chemistry. In: Riebesell, U., et al. (Eds.), *Guide to Best Practices in Ocean Acidification Research and Data*  
500 *Reporting*. Office for Official Publications of the European Communities, Luxembourg, pp. 41–52, 2010.

501 [Gattuso, J. P., Magnan, A., Bille, R., Cheung, W. W. L., Howes, E. L., Joos, F., Allemand, D., Bopp, L., Cooley, S.](#)  
502 [R., Eakin, C. M., Hoegh-Guldberg, O., Kelly, R. P., Portner, H. O., Rogers, A. D., Baxter, J. M., Laffoley, D.,](#)  
503 [Osborn, D., Rankovic, A., Rochette, J., Sumaila, U.R., Treyer, S., Turley, C.: Contrasting futures for ocean](#)  
504 [and society from different anthropogenic CO<sub>2</sub> emissions scenarios, \*Science\*, 349 \(6243\), aac4722, 2015.](#)

505 Hopkins, F. E. and Archer, S. D.: Consistent increase in dimethyl sulfide (DMS) in response to high CO<sub>2</sub> in five  
506 shipboard bioassays from contrasting NW European waters, *Biogeosciences*, 11, 4925–4940, 2014.

507 Hopkins, F. E., Kimmance, S. A., Stephens, J. A., Bellerby, R. G. J., Brussaard, C. P. D., Czerny, J., Schulz, K. G.  
508 Archer, S. D.: Response of halocarbons to ocean acidification in the Arctic, *Biogeosciences*, 10, 2331–2345,  
509 2013.

510 Hopkins, F. E., Turner, S. M., Nightingale, P. D., Steinke, M., Liss, P. S.: Ocean acidification and marine biogenic  
511 trace gas production, *P. Natl. Acad. Sci. USA*, 107, 760–765, 2010.

512 Huang, Y. B., Liu, X., Edward, A. L., Chen, B. Z., Li Y., Xie, Y. Y., Wu, Y. P., Gao K. S., Huang, B. Q.: Effects of  
513 increasing atmospheric CO<sub>2</sub> on the marine phytoplankton and bacterial metabolism during a bloom: A coastal  
514 mesocosm study, *Sci. Total. Environ.*, 633, 618–629, 2018.

515 Hughes, C., Johnson, M., Utting, R., Turner, S., Malin, G., Clarke, A., Liss, P. S.: Microbial control of  
516 bromocarbon concentrations in coastal waters of the western Antarctic Peninsula, *Mar. Chem.*, 151, 35–46,  
517 2013.

518 Jenkins, M. E., Cox, R. A., Hayman, G. D.: Kinetics of the reaction of IO radicals with HO<sub>2</sub> at 298 K, *Chem. Phys.*  
519 *Lett.*, 177, 272–278, 1991.

520 Karlsson, A., Auer, N., Schulz-Bull, D., Abrahamsson, K.: Cyanobacterial blooms in the Baltic—A source of  
521 halocarbons, *Mar. Chem.*, 110, 129–139, 2008.

522 Kiene, R. P., Linn, L. J., Gonzalez, J., Moran, M. A., Bruton, J. A.: Dimethylsulfoniopropionate and methanethiol  
523 are important precursors of methionine and protein-sulfur in marine bacterioplankton, *Appl. Environ.*  
524 *Microbiol.*, 65, 4549–4558, 1999.

525 Kiene, R. P., Linn, L. J.: The fate of dissolved dimethylsulfoniopropionate (DMSP) in seawater: tracer studies  
526 using <sup>35</sup>S-DMSP, *Geochim. Cosmochim. Acta.*, 64, 2797–2810, 2000.

527 Kiene, R. P., Slezak, D.: Low dissolved DMSP concentrations in seawater revealed by small volume gravity  
528 filtration and dialysis sampling, *Limnol. Oceanogr. Methods*, 4, 80–95, 2006.

529 Kirkwood, M., Le Brun, N. E., Todd, J. D., Johnston, A. W. B.: The dddP gene of *Roseovarius nubinhibens*  
530 encodes a novel lyase that cleaves dimethylsulfoniopropionate into acrylate plus dimethyl sulfide,  
531 *Microbiology*, 156, 1900–1906, 2010.

532 Liss, P., Marandino, C. A., Dahl, E., Helmig, D., Hints, E. J., Hughes, C., Johnson, M., Moore, R. M., Plane, J. M.  
533 C., Quack, B., Singh, H. B., Stefels, J., von Glasow, R., and Williams, J.: Short-lived trace gases in the

534 surface ocean and the atmosphere, in: *Ocean-Atmosphere Interactions of Gases and Particles*, edited by: Liss,  
535 P. and Johnson, M., 55–112, 2014.

536 Liu, N., Tong, S., Yi, X., Li, Y., Li, Z., Miao, H., Wang, T., Li, F., Yan, D., Huang, R., Wu, Y., Hutchins, D. A.,  
537 Beardall, J., Dai, M., Gao, K.: Carbon assimilation and losses during an ocean acidification mesocosm  
538 experiment, with special reference to algal blooms, *Mar. Environ. Res.*, 129, 229–235, 2017.

539 Manley, S. L. and De La Cuesta, J. L.: Methyl iodide production from marine phytoplankton cultures, *Limnol.*  
540 *Oceanogr.*, 42, 142–147, 1997.

541 Orr, J. C. Fabry, V. J., Aumont, O., Bopp, L., Doney, S. C., Feely, R. A., Gnanadesikan, A., Gruber, N., Ishida,  
542 A., Joos, F., Key, R. M., Lindsay, K., Maier-Reimer, E., Matear, R., Monfray, P., Mouchet, A., Najjar, R.  
543 G., Plattner, G. K., Rodgers, K. B., Sabine, C. L., Sarmiento, J. L., Schlitzer, R., Slater, R. D., Totterdell, I.  
544 J., Weirig, M. F., Yamanaka, Y., Yool, A.: Anthropogenic ocean acidification over the twenty first century and  
545 its impact on calcifying organisms, *Nature*, 437, 681–686. 2005.

546 [Porra, R. J.: The chequered history of the development and use of simultaneous equations for the accurate](#)  
547 [determination of chlorophylls a and b, \*Photosynth. Res.\*, 73, 149–156, 2002.](#)

548 [Porter, K. G., Feig, Y. S.: DAPI for identifying and counting aquatic microflora, \*Limnol. Oceanogr.\*, 25, 946–948,](#)  
549 [1980.](#)

550 Quinn, P. K., Bates, T. S.: The case against climate regulation via oceanic phytoplankton sulphur emissions, *Nature*,  
551 480, 51–56, 2011.

552 [Raina, J. B., Tapiolas, D., Motti, C. A., Foret, S., Seemann, T., Tebben, J.: Isolation of an antimicrobial compound](#)  
553 [produced by bacteria associated with reef-building corals, \*PeerJ\*, 4, e2275, 2016](#)

554 Richter, U., Wallace, D. W. R.: Production of methyl iodide in the tropical Atlantic Ocean, *Geophys. Res. Lett.*, 31,  
555 L23S03, doi:10.1029/2004GL020779, 2004.

556 Riebesell, U., Czerny, J., von Brckel, K., Boxhammer, T., Bűdenbender, J., Deckelnick, M., Fischer, M.,  
557 Hoffmann, Krug, S. A., Lentz, U., Ludwig, A., Muche, R., Schulz, K. G.: Technical Note: a mobile sea-going  
558 mesocosm system-new opportunities for ocean change research, *Biogeosciences*, 10, 1835–1847, 2013.

559 Roy, R., Pratihary, A., Narvenkar, G., Mochemadkar, S., Gauns, M., and Naqvi, S. W. A.: The relationship between  
560 volatile halocarbons and phytoplankton pigments during a *Trichodesmium* bloom in the coastal eastern  
561 Arabian Sea, *Estuar. Coast. Shelf Sci.*, 95, 110–118, 2011.

562 Simó R., Archer, S. D., Pedros-Alio, C., Gilpin, L., StelfoxWiddicombe, C. E.: Coupled dynamics of  
563 dimethylsulfoniopropionate and dimethylsulfide cycling and the microbial food web in surface waters of the  
564 North Atlantic, *Limnol. Oceanogr.*, 47, 53–61, 2002.

565 Simó R., Vila-Costa, M., Alonso-Sáez, L., Cardelús, C., Guadayol, Ó., Vázquez-Dominguez, E., and Gasol, J. M.:  
566 Annual DMSP contribution to S and C fluxes through phytoplankton and bacterioplankton in a NW  
567 Mediterranean coastal site, *Aquat. Microb. Ecol.*, 57, 43–55, 2009.

568 Stefels, J., Dijkhuizen, L.: Characteristics of DMSP-lyase in *Phaeocystis* sp. (Prymnesiophyceae), *Mar. Ecol. Prog.*  
569 *Ser.*, 131, 307–313, 1996.

570 Stefels, J., Steink, M., Turner, S., Malin, G., Belviso, S.: Environmental constraints on the production of the  
571 climatically active gas dimethylsulphide (DMS) and implications for ecosystem modeling, *Biogeochemistry*,  
572 83, 245–275, 2007.

573 Steinke, M., Kirst, G. O.: Enzymatic cleavage of dimethylsulfoniopropionate (DMSP) in cell-free extracts of the  
574 marine macroalga *Enteromorpha clathrata* (Roth) Grev (Ulvales, Chlorophyta), *J. Exp. Mar. Biol. Ecol.*, 201,  
575 73–85, 1996.



576 Todd, J. D., Rogers, R., Li, Y. G., Wexler, M., Bond, P. L., Sun, L., Cruson, A. R. J., Malin, G., Steinke, M.,  
577 Johnston, A. W. B.: Structural and regulatory genes required to make the gas dimethyl sulfide in bacteria,  
578 Science, 315, 666–669, 2007.

579 Visscher, P. T., Quist, P., van Gemerden, H.: Methylated sulfur compounds in microbial mats: in situ  
580 concentrations and metabolism by a colorless sulfur bacterium, *Appl. Environ. Microbiol.*, 57, 1758–1763,  
581 1991.

582 Vogt, M., Steinke, M., Turner, S. M., Paulino, A., Meyerhöfer, M., Riebesell, U., LeQuéré C., and Liss, P. S.:  
583 Dynamics of dimethylsulphoniopropionate and dimethylsulphide under different CO<sub>2</sub> concentrations during  
584 a mesocosm experiment, *Biogeosciences*, 5, 407–419, 2008.

585 Webb, A. L., Leedham-Elvidge, E., Hughes, C., Hopkins, F. E., Malin, G., Bach, L. T., Schulz, K., Crawford, K.,  
586 Brussaard, C. P. D., Stuhr, A., Riebesell, U., Liss, P. S.: Effect of ocean acidification and elevated *f* CO<sub>2</sub> on  
587 trace gas production by a Baltic Sea summer phytoplankton community, *Biogeosciences*, 13, 4595–4613,  
588 2016.

589 Webb, A. L., Malin, G., Hopkins, F. E., Ho, K. L., Riebesell, U., Schulz, K., Larsen, A., and Liss, P.: Ocean  
590 acidification has different effects on the production of dimethylsulphide and dimethylsulphoniopropionate  
591 measured in cultures of *Emiliana huxleyi* RCC1229 and mesocosm study: a comparison of laboratory  
592 monocultures and community interactions, *Environ. Chem.*, 13, EN14268, doi:10.1071/EN14268, 2015.

593 Wingenter, O. W., Haase, K. B., Zeigler, M., Blake, D. R., Rowland, F. S., Sive, B. C., Paulino, A., Thyrhaug, R.,  
594 Larsen, A., Schulz K., Meyerhofer, M., Riebesell, U.: Unexpected consequences of increasing CO<sub>2</sub> and ocean  
595 acidity on marine production of DMS and CH<sub>2</sub>Cl<sub>2</sub>: Potential climate impacts, *Geophys. Res. Lett.*, 34,  
596 L05710, 2007.

- 597 Yang, G. P., Lu, X. L., Song, G. S., Wang, X. M.: Purge-and-trap gas chromatography method for analysis of  
598 methyl chloride and methyl bromide in seawater, *Chin. J. Anal. Chem.*, 38 (5), 719–722, 2010.
- 599 Yost, D. M., Mitchelmore, C. L.: Dimethylsulfoniopropionate (DMSP) lyase activity in different strains of the  
600 symbiotic alga *Symbiodinium microadriaticum*, *Mar. Ecol. Prog. Ser.*, 386, 61–70, 2009.
- 601 Yuan, D., Yang, G. P., He, Z.: Spatio-temporal distributions of chlorofluorocarbons and methyl iodide in the  
602 Changjiang (Yangtze River) estuary and its adjacent marine area, *Mar. Pollut. Bull.*, 103 (1-2), 247–259, 2016.
- 603 Zhang, S. H., Yang, G. P., Zhang, H. H., Yang, J.: Spatial variation of biogenic sulfur in the south Yellow Sea and  
604 the East China Sea during summer and its contribution to atmospheric sulfate aerosol, *Sci. Total Environ.*,  
605 488–489, 157–167, 2014.
- 606
- 607

608

### Figure captions

609 Fig. 1 Temporal changes of pH in the HC (1,000  $\mu\text{atm}$ , solid squares) and LC (400  $\mu\text{atm}$ , white  
610 squares) mesocosms (3,000 L). Data are mean  $\pm$  standard deviation,  $n = 3$  (triplicate independent  
611 mesocosm bags) (Origin 8.0).

612 Fig. 2 Temporal changes in DMS, DMSP and DCB concentrations in the HC (1,000  $\mu\text{atm}$ , black  
613 squares) and LC (400  $\mu\text{atm}$ , white squares) mesocosms (3,000 L). Data are mean  $\pm$  standard  
614 deviation,  $n = 3$  (triplicate independent mesocosm bags).

615 Fig. 3 Temporal changes in  $\text{CHBrCl}_2$ ,  $\text{CH}_3\text{Br}$ ,  $\text{CH}_2\text{Br}_2$  and  $\text{CH}_3\text{I}$  concentrations in the HC (1,000  
616  $\mu\text{atm}$ , black squares) and LC (400  $\mu\text{atm}$ , white squares) mesocosms (3,000 L). Data are mean  $\pm$   
617 standard deviation,  $n = 3$  (triplicate independent mesocosm bags).

618

619

620

621

622

623

624

625

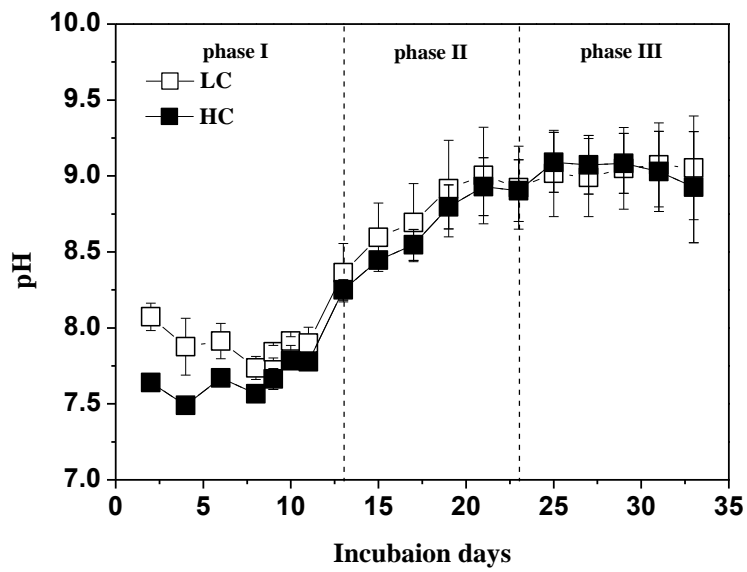

626

627 **Fig. 1** Temporal changes of pH in the HC (1,000 μatm, solid squares) and LC (400 μatm, white squares)

628 mesocosms (3,000 L). Data are mean ± standard deviation, n = 3 (triplicate independent mesocosm bags) (Origin

629 8.0).

630

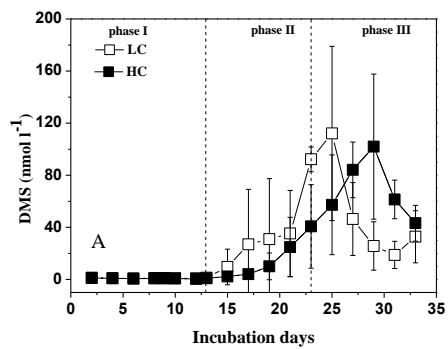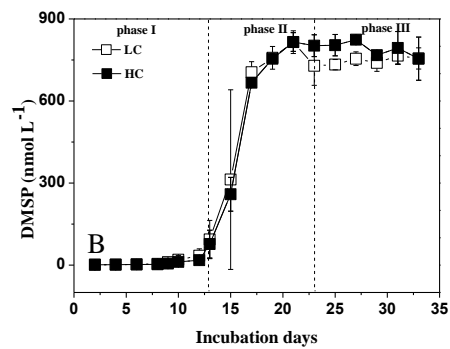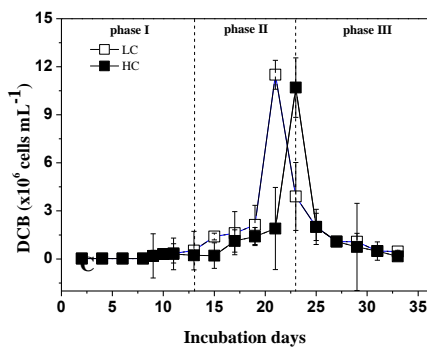

631

632

633 Fig. 2 Temporal changes in DMS (A), DMSP (B), DCB (C) concentrations in the HC (1,000  $\mu\text{atm}$ , black squares)

634 and LC (400  $\mu\text{atm}$ , white squares) mesocosms (3,000 L). Data are mean  $\pm$  standard deviation, n = 3 (triplicate

635 independent mesocosm bags) (Origin 8.0).

636

637

638

639

640

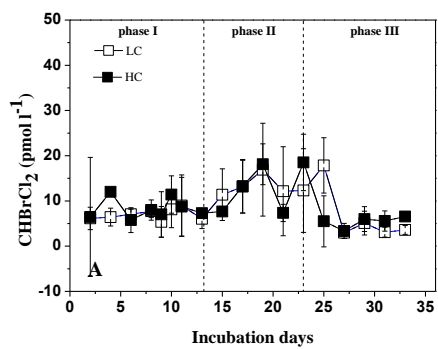

641

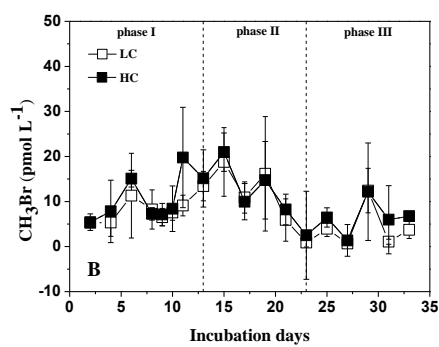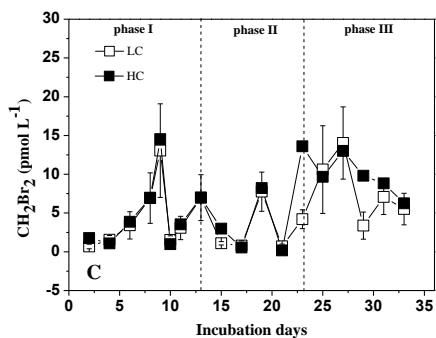

642

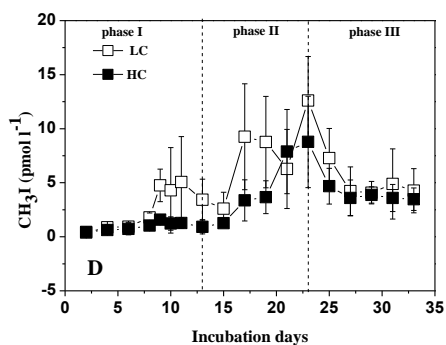

643 Fig. 3 Temporal changes in  $\text{CHBrCl}_2$  (A),  $\text{CH}_3\text{Br}$  (B),  $\text{CH}_2\text{Br}_2$  (C) and  $\text{CH}_3\text{I}$  (D) concentrations in the HC (1,000

644  $\mu\text{atm}$ , black squares) and LC (400  $\mu\text{atm}$ , white squares) mesocosms (3,000 L). Data are mean  $\pm$  standard deviation,

645  $n = 3$  (triplicate independent mesocosm bags) (Origin 8.0).

646

647 **Table 1.** The conditions of DIC,  $pH_T$ ,  $pCO_2$  and nutrient concentrations in the mesocosm experiments. “-” means  
 648 that the values were below the detection limit.

|           |    | $pH_T$        | DIC<br>( $\mu\text{mol kg}^{-1}$ ) | $pCO_2$<br>( $\mu\text{atm}$ ) | $NO_3^-+NO_2^-$<br>( $\mu\text{mol L}^{-1}$ ) | $NH_4^+$<br>( $\mu\text{mol L}^{-1}$ ) | $PO_4^{3-}$<br>( $\mu\text{mol L}^{-1}$ ) | $SiO_3^{2-}$<br>( $\mu\text{mol L}^{-1}$ ) |
|-----------|----|---------------|------------------------------------|--------------------------------|-----------------------------------------------|----------------------------------------|-------------------------------------------|--------------------------------------------|
| day 0     | LC | 8.0 $\pm$ 0.1 | 2181 $\pm$ 29                      | 1170~1284                      | 52~56                                         | 19~23                                  | 2.6 $\pm$ 0.2                             | 38~40                                      |
|           | HC | 7.5 $\pm$ 0.1 | 2333 $\pm$ 34                      | 340~413                        | 51~55                                         | 19~23                                  | 2.5 $\pm$ 0.2                             | 38~39                                      |
| Phase I   | LC | 7.9~8.4       | 1825~2178                          | 373~888                        | 15~52                                         | 1.6~20                                 | 0.5~2.6                                   | 31~38                                      |
|           | HC | 7.4~8.2       | 2029~2338                          | 1295~1396                      | 47~54                                         | 0.2~21                                 | 0.7~2.5                                   | 34~39                                      |
| Phase II  | LC | 8.4~8.5       | 1706~1745                          | 46~749                         | -- 15.9                                       | -                                      | 0.1~0.5                                   | 10~24                                      |
|           | HC | 8.4~8.6       | 1740~1891                          | 59~1164                        | 1.1~25                                        | -                                      | --0.1                                     | 29~30                                      |
| Phase III | LC | 8.5~8.8       | 1673~1706                          | 30~43                          | -                                             | -                                      | -                                         | 10~16                                      |
|           | HC | 8.6~8.7       | 1616~1740                          | 34~110                         | -                                             | -                                      | --0.3                                     | 24~25                                      |

649

**Table 2.** Relationships between DMS, DMSP, Chl *a*, CHBrCl<sub>2</sub>, CH<sub>3</sub>Br, CH<sub>2</sub>Br<sub>2</sub>, CH<sub>3</sub>I, DCB, *Thalassiosira weissflogii* (*T. weissflogii*) and *Phaeodactylum tricornutum* (*P. tricornutum*) concentrations in the LC treatments.

|                                 | DMS<br>(nmol L <sup>-1</sup> ) | DMSP<br>(nmol L <sup>-1</sup> ) | Chl <i>a</i><br>(µg L <sup>-1</sup> ) | CHBrCl <sub>2</sub><br>(pmol l <sup>-1</sup> ) | CH <sub>3</sub> Br<br>(pmol l <sup>-1</sup> ) | CH <sub>2</sub> Br <sub>2</sub><br>(pmol l <sup>-1</sup> ) | CH <sub>3</sub> I<br>(pmol l <sup>-1</sup> ) | DCB<br>(×10 <sup>6</sup> cells mL <sup>-1</sup> ) | <i>T. weissflogii</i><br>(×10 <sup>3</sup> cells mL <sup>-1</sup> ) | <i>P. tricornutum</i><br>(cells mL <sup>-1</sup> ) |
|---------------------------------|--------------------------------|---------------------------------|---------------------------------------|------------------------------------------------|-----------------------------------------------|------------------------------------------------------------|----------------------------------------------|---------------------------------------------------|---------------------------------------------------------------------|----------------------------------------------------|
| DMS                             | 1                              |                                 |                                       |                                                |                                               |                                                            |                                              |                                                   |                                                                     |                                                    |
| DMSP                            | 0.701**                        | 1                               |                                       |                                                |                                               |                                                            |                                              |                                                   |                                                                     |                                                    |
| Chl <i>a</i>                    | 0.597**                        | 0.792**                         | 1                                     |                                                |                                               |                                                            |                                              |                                                   |                                                                     |                                                    |
| CHBrCl <sub>2</sub>             | 0.526                          | 0.280                           | 0.559                                 | 1                                              |                                               |                                                            |                                              |                                                   |                                                                     |                                                    |
| CH <sub>3</sub> Br              | -0.413                         | -0.230                          | 0.196                                 | 0.313                                          | 1                                             |                                                            |                                              |                                                   |                                                                     |                                                    |
| CH <sub>2</sub> Br <sub>2</sub> | 0.310                          | 0.180                           | 0.001                                 | -0.136                                         | -0.308                                        | 1                                                          |                                              |                                                   |                                                                     |                                                    |
| CH <sub>3</sub> I               | 0.694**                        | 0.654**                         | 0.717**                               | 0.596*                                         | -0.151                                        | 0.129                                                      | 1                                            |                                                   |                                                                     |                                                    |
| DCB                             | 0.643**                        | 0.520*                          | 0.522*                                | 0.394                                          | -0.268                                        | -0.038                                                     | 0.762**                                      | 1                                                 |                                                                     |                                                    |
| <i>T. weissflogii</i>           | 0.410                          | 0.617**                         | 0.899**                               | 0.301                                          | 0.322                                         | 0.028                                                      | 0.680**                                      | 0.399                                             | 1                                                                   |                                                    |
| <i>P. tricornutum</i>           | 0.560*                         | 0.961**                         | 0.821**                               | 0.528                                          | -0.032                                        | 0.162                                                      | 0.588**                                      | 0.334                                             | 0.685**                                                             | 1                                                  |



**Table 3.** Relationships between DMS, DMSP, Chl *a*, CHBrCl<sub>2</sub>, CH<sub>3</sub>Br, CH<sub>2</sub>Br<sub>2</sub>, CH<sub>3</sub>I, DCB, *Thalassiosira weissflogii* (*T. weissflogii*) and *Phaeodactylum tricornutum* (*P. tricornutum*) concentrations in the HC treatments.

|                                 | DMS<br>(nmol L <sup>-1</sup> ) | DMSP<br>(nmol L <sup>-1</sup> ) | Chl <i>a</i><br>(µg L <sup>-1</sup> ) | CHBrCl <sub>2</sub><br>(pmol l <sup>-1</sup> ) | CH <sub>3</sub> Br<br>(pmol l <sup>-1</sup> ) | CH <sub>2</sub> Br <sub>2</sub><br>(pmol l <sup>-1</sup> ) | CH <sub>3</sub> I<br>(pmol l <sup>-1</sup> ) | DCB<br>(×10 <sup>6</sup> cells mL <sup>-1</sup> ) | <i>T. weissflogii</i><br>(×10 <sup>3</sup> cells mL <sup>-1</sup> ) | <i>P. tricornutum</i><br>(cells mL <sup>-1</sup> ) |
|---------------------------------|--------------------------------|---------------------------------|---------------------------------------|------------------------------------------------|-----------------------------------------------|------------------------------------------------------------|----------------------------------------------|---------------------------------------------------|---------------------------------------------------------------------|----------------------------------------------------|
| DMS                             | 1                              |                                 |                                       |                                                |                                               |                                                            |                                              |                                                   |                                                                     |                                                    |
| DMSP                            | 0.752**                        | 1                               |                                       |                                                |                                               |                                                            |                                              |                                                   |                                                                     |                                                    |
| Chl <i>a</i>                    | 0.318*                         | 0.738**                         | 1                                     |                                                |                                               |                                                            |                                              |                                                   |                                                                     |                                                    |
| CHBrCl <sub>2</sub>             | 0.324                          | 0.094                           | 0.326                                 | 1                                              |                                               |                                                            |                                              |                                                   |                                                                     |                                                    |
| CH <sub>3</sub> Br              | -0.410                         | -0.349                          | 0.065                                 | 0.076                                          | 1                                             |                                                            |                                              |                                                   |                                                                     |                                                    |
| CH <sub>2</sub> Br <sub>2</sub> | 0.540*                         | 0.352                           | 0.142                                 | 0.233                                          | -0.377                                        | 1                                                          |                                              |                                                   |                                                                     |                                                    |
| CH <sub>3</sub> I               | 0.694**                        | 0.816**                         | 0.741**                               | 0.690*                                         | -0.407                                        | 0.316                                                      | 1                                            |                                                   |                                                                     |                                                    |
| DCB                             | 0.544*                         | 0.522                           | 0.549*                                | 0.532                                          | -0.311                                        | 0.368                                                      | 0.851*                                       | 1                                                 |                                                                     |                                                    |
| <i>T. weissflogii</i>           | 0.355                          | 0.743**                         | 0.930**                               | 0.304                                          | 0.076                                         | 0.233                                                      | 0.690**                                      | 0.567                                             | 1                                                                   |                                                    |
| <i>P. tricornutum</i>           | 0.635**                        | 0.954**                         | 0.803**                               | 0.143                                          | -0.257                                        | 0.267                                                      | 0.834**                                      | 0.559                                             | 0.820**                                                             | 1                                                  |
