# Supplementary figures and images for: Effect of elevated p CO 2 on trace gas production during an ocean acidification mesocosm experiment
Source: Copernicus journal article supplement (doi:10.5194/bg-2018-148), 2018-05-16

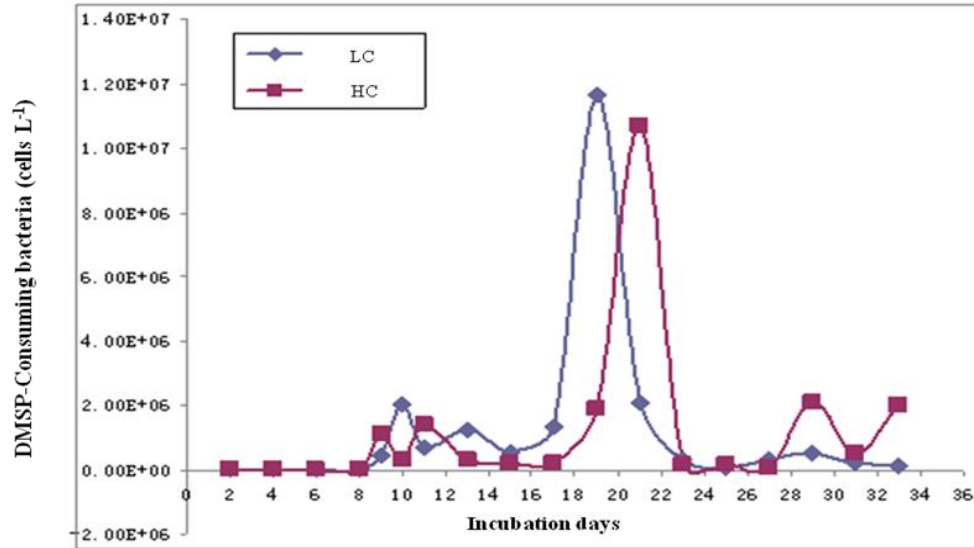

**Fig. S1.** DMSP-consuming bacterial abundance in the HC and LC mesocosms (Yu et al., unpublished data).

Supplement: Supplementary file 1 [file bg-2018-148-supplement.pdf]
